# Supplementary material for: Association between total dietary sugar intake and gallstones in Americans: a study based on machine learning
Source: Research Square preprint supplement (doi:10.21203/rs.3.rs-7464318/v1), 2025-10-13
Supplement: Supplementary file 1 [file 63f70dc8edbb6b216d302381.docx]

**Supplement Table 1**. Classification and definition of covariates.

| Covariate Category | Covariate Name | Categories or source |
| --- | --- | --- |
| Sociodemographic Variables | Gender | Male, Female |
|  | Age | From the demographic information obtained in survey questionnaire inquiries |
|  | Race | Mexican American, Other Hispanic, Non-Hispanic White, Non-Hispanic Black, Other Race (including multi-racial) |
|  | Educational Level | Less than high school, High school graduate/GED or equivalent, Higher than high school |
|  | Household Poverty-to-Income Ratio (PIR) | ≤1.3, 1.3–3.5, >3.5 |
|  | Marital Status | Married/Living with a partner, Widowed/Divorced/Separated, Never married |
| Life behavior and disease Variables | Body Mass Index (BMI) | From physical examination |
|  | Smoking Status | Nonsmokers (<100 cigarette in lifetime), Former smokers (>100 cigarette in lifetime but no cigarette in current), Current smokers (>100 cigarette in lifetime and cigarette in current) |
|  | Drinking Status | Nondrinkers (no alcohol), Moderate drinkers (≤2 drinks/day for male, ≤1 drink/day for female), Heavy drinkers (>2 drinks/day for male, >1 drink/day for female) in last 12 months |
|  | Diabetes and hypertension | From the medical history obtained in survey questionnaire inquiries |
|  | Physical activity | Yes [metabolic equivalent (MET) of a week≥600], No (MET of a week <600) |
|  | Energy intake | From the average of two dietary intakes |
